# Supplementary material
Source: MDPI journal article supplement (https://www.mdpi.com/search?q=nutrients-10-01679)
Supplement: s001 [file nutrients-10-01679-s001.pdf]

Supplementary table. List of < 6 kDa peptides arisen from GI simulated digestion of raw (CTRL-GI), autoclaved (AC10) and prehydrated/autoclaved almonds (H<sub>2</sub>O-AC10) searched in IEDB database for scouting linear epitope sequences.

| Sample  | Sequence        | Protein Accession number | Allergen  | Epitope ID | Epitopic sequence | Rif |
|---------|-----------------|--------------------------|-----------|------------|-------------------|-----|
| CTRL-GI | HVSSDHNQLDQNPR  | E3SH28; Q43607           | Pru du 6  | -          | -                 | -   |
|         | FHVSSDHNQLDQNPR | E3SH28; Q43607           | Pru du 6  | -          | -                 | -   |
|         | HVSSDHNQLDQNP   | E3SH28; Q43607           | Pru du 6  | -          | -                 | -   |
|         | TKSQTHVPIRP     | P82952                   | Pru du AP | -          | -                 | -   |
|         | TKSQTHVPIRPN    | P82952                   | Pru du AP | -          | -                 | -   |
|         | GEQGRPGQH       | E3SH28; Q43607           | Pru du 6  | -          | -                 | -   |
|         | VSSDHNQLDQNPR   | E3SH28; Q43607           | Pru du 6  | -          | -                 | -   |
|         | QEQQGQGRPQ      | E3SH28; Q43607           | Pru du 6  | -          | -                 | -   |
|         | EQQGQGRPQ       | E3SH28; Q43607           | Pru du 6  | -          | -                 | -   |
|         | QQGEQGRPGQH     | E3SH28; Q43607           | Pru du 6  | -          | -                 | -   |
|         | FHVSSDHNQLDQNP  | E3SH28; Q43607           | Pru du 6  | -          | -                 | -   |
|         | QQGEQGRPGQHQQP  | E3SH28; Q43607           | Pru du 6  | -          | -                 | -   |
|         | QQGEQGRPGQHQQPF | E3SH28; Q43607           | Pru du 6  | -          | -                 | -   |
|         | QGQDDNRNEI      | E3SH29; Q43608           | Pru du 6  | -          | -                 | -   |
|         | GNLDFVQPPR      | E3SH28; Q43607           | Pru du 6  | -          | -                 | -   |
|         | RGNLDFVQPPR     | E3SH28; Q43607           | Pru du 6  | -          | -                 | -   |
|         | QQGQGRPQ        | E3SH28; Q43607           | Pru du 6  | -          | -                 | -   |
|         | QQGEQGRPGQ      | E3SH28; Q43607           | Pru du 6  | -          | -                 | -   |
|         | RQQQQGEQG       | E3SH28; Q43607           | Pru du 6  | -          | -                 | -   |
|         | QQEEGRQQEQ      | E3SH28; Q43607           | Pru du 6  | -          | -                 | -   |
|         | QAREPDNRIQ      | E3SH28; Q43607           | Pru du 6  | -          | -                 | -   |
|         | AGNPQDEFNPQ     | E3SH29; Q43608; S5LMS1   | Pru du 6  | -          | -                 | -   |
|         | QQQQGEQGRQQGQ   | E3SH28; Q43607           | Pru du 6  | -          | -                 | -   |
|         | GEQGRPGQHQQPF   | E3SH28; Q43607           | Pru du 6  | -          | -                 | -   |
|         | ERQQQQGEQG      | E3SH28; Q43607           | Pru du 6  | -          | -                 | -   |
|         | QQEQQGNGNNV     | Q43607                   | Pru du 6  | -          | -                 | -   |

|                      |                        |           |   |   |   |
|----------------------|------------------------|-----------|---|---|---|
| GNLDFVQPPRG          | E3SH28; Q43607         | Pru du 6  | - | - | - |
| QQGQQEQQQE           | E3SH28; Q43607         | Pru du 6  | - | - | - |
| GQDDNRNEIV           | E3SH29; Q43608         | Pru du 6  | - | - | - |
| REGDIIALPA           | E3SH29; Q43608; S5LMS1 | Pru du 6  | - | - | - |
| NENGDAILDQE          | E3SH28; Q43607         | Pru du 6  | - | - | - |
| QQQQGEQGRQQGQ        | E3SH28; Q43607         | Pru du 6  | - | - | - |
| RLKENIGNPE           | E3SH28; Q43607         | Pru du 6  | - | - | - |
| RIQAEAGQIET          | E3SH28; Q43607         | Pru du 6  | - | - | - |
| IVPQNHGVIQQ          | E3SH28; Q43607         | Pru du 6  | - | - | - |
| TESWNPSDPQ           | E3SH29; Q43608; S5LMS1 | Pru du 6  | - | - | - |
| QQEQQQGQQGRPQ        | E3SH28; Q43607         | Pru du 6  | - | - | - |
| KSQTHVPIRPN          | P82952                 | Pru du AP | - | - | - |
| NPQDEFNPQQGR         | E3SH29; Q43608         | Pru du 6  | - | - | - |
| RLKENIGNPERAD        | E3SH28; Q43607         | Pru du 6  | - | - | - |
| EPDNRIQAEAGQIET      | E3SH28; Q43607         | Pru du 6  | - | - | - |
| GEQGRPGQHQQP         | E3SH28; Q43607         | Pru du 6  | - | - | - |
| SQTHVPIRPN           | P82952                 | Pru du AP | - | - | - |
| GGAVAVAAPGAGAGAAAPAA | Q8H2B9                 | Pru du 5  | - | - | - |
| NENGDAILDQ           | E3SH28; Q43607         | Pru du 6  | - | - | - |
| IVPQNHGVIQ           | E3SH28; Q43607         | Pru du 6  | - | - | - |
| LDLNNDQNQLDQVPR      | E3SH29; Q43608         | Pru du 6  | - | - | - |
| QEQQGNGNNV           | Q43607                 | Pru du 6  | - | - | - |
| RQQEQQGNGNNV         | Q43607                 | Pru du 6  | - | - | - |
| QGGGGQDNGVEET        | E3SH29; Q43608         | Pru du 6  | - | - | - |
| VIQQAGNQGFE          | E3SH28; Q43607         | Pru du 6  | - | - | - |
| IQAEAGQIET           | E3SH28; Q43607         | Pru du 6  | - | - | - |
| RGNLDFVQPP           | E3SH28; Q43607         | Pru du 6  | - | - | - |
| QVVENNGDPI           | E3SH29; Q43608         | Pru du 6  | - | - | - |
| REPDNRIQAEAGQIET     | E3SH28; Q43607         | Pru du 6  | - | - | - |
| NLQGQNDNRNQ          | E3SH28; Q43607         | Pru du 6  | - | - | - |
| EEGRQQEQQQGQQGRPQ    | E3SH28; Q43607         | Pru du 6  | - | - | - |
| QQQEEGRQQE           | E3SH28; Q43607         | Pru du 6  | - | - | - |

|         |                 |                        |          |   |   |   |
|---------|-----------------|------------------------|----------|---|---|---|
|         | LRALPDEVLA      | E3SH28; Q43607         | Pru du 6 | - | - | - |
|         | LRLKENIGNPE     | E3SH28; Q43607         | Pru du 6 | - | - | - |
|         | QQEEGRQQEQ      | E3SH28; Q43607         | Pru du 6 | - | - | - |
|         | LAGNPQDEFN      | E3SH29; Q43608; S5LMS1 | Pru du 6 | - | - | - |
|         | AGAGAAAPAAAPK   | Q8H2B9                 | Pru du 5 | - | - | - |
|         | LAGNPENEFN      | E3SH28; Q43607         | Pru du 6 | - | - | - |
|         | NENGDAILDQEVQQG | E3SH28; Q43607         | Pru du 6 | - | - | - |
|         | QLSPQNCQLNQL    | E3SH28; Q43607         | Pru du 6 | - | - | - |
|         | SGGGAVAVAAPGAGA | Q8H2B9                 | Pru du 5 | - | - | - |
|         | TIALSSSQQR      | E3SH28; Q43607         | Pru du 6 | - | - | - |
|         | SRSAGGRGDQ      | E3SH29; Q43608         | Pru du 6 | - | - | - |
|         | AGLAAGLP GK     | C0L015                 | Pru du 3 | - | - | - |
|         | QQEQQGNGNN      | Q43607                 | Pru du 6 | - | - | - |
|         | TFEESQQSSQ      | E3SH28; Q43607         | Pru du 6 | - | - | - |
|         | LQGQNDNRNQIIQ   | Q43607                 | Pru du 6 | - | - | - |
|         | QQQQQQQGQGNGNN  | E3SH29; Q43608         | Pru du 6 | - | - | - |
|         | RQQEQQGNGN      | Q43607                 | Pru du 6 | - | - | - |
|         | VAVAAPGAGAGAAAP | Q8H2B9                 | Pru du 5 | - | - | - |
|         | AQALNVNPETAR    | E3SH29; Q43608         | Pru du 6 | - | - | - |
|         | RLSQNIGDPS      | E3SH29; Q43608         | Pru du 6 | - | - | - |
|         | STLNSHNLPI      | E3SH28; Q43607         | Pru du 6 | - | - | - |
|         | SGGGAVAVAAPG    | Q8H2B9                 | Pru du 5 | - | - | - |
|         | IREGDIIALPA     | E3SH29; Q43608; S5LMS1 | Pru du 6 | - | - | - |
|         | PSGGGAVAVAA     | Q8H2B9                 | Pru du 5 | - | - | - |
|         | RALPDEVLAN      | E3SH28; Q43607         | Pru du 6 | - | - | - |
|         | AILDQEVQQG      | E3SH28; Q43607         | Pru du 6 | - | - | - |
|         | LIPQNHAVIT      | E3SH29; Q43608         | Pru du 6 | - | - | - |
| AC10-GI | HVSSDHNQLDQNPR  | E3SH28; Q43607         | Pru du 6 | - | - | - |
|         | FHVSSDHNQLDQNPR | E3SH28; Q43607         | Pru du 6 | - | - | - |
|         | QQEQQQGQGRPQ    | E3SH28; Q43607         | Pru du 6 | - | - | - |
|         | QQGEQGRPGQH     | E3SH28; Q43607         | Pru du 6 | - | - | - |
|         | HVSSDHNQLDQNP   | E3SH28; Q43607         | Pru du 6 | - | - | - |

|                  |                |           |   |   |   |
|------------------|----------------|-----------|---|---|---|
| TKSQTHVPIRPN     | P82952         | Pru du AP | - | - | - |
| VSSDHNQLDQNPR    | E3SH28; Q43607 | Pru du 6  | - | - | - |
| QQGEQGRPGQHQQ    | E3SH28; Q43607 | Pru du 6  | - | - | - |
| QQQQQQGRPQ       | E3SH28; Q43607 | Pru du 6  | - | - | - |
| QQGEQGRPGQHQQP   | E3SH28; Q43607 | Pru du 6  | - | - | - |
| QEQQQQQQGRPQ     | E3SH28; Q43607 | Pru du 6  | - | - | - |
| EQQQQQQQGRPQ     | E3SH28; Q43607 | Pru du 6  | - | - | - |
| QQQDDNRNEI       | E3SH29; Q43608 | Pru du 6  | - | - | - |
| QQGEQGRPGQHQQPF  | E3SH28; Q43607 | Pru du 6  | - | - | - |
| RGNLDFVQPPR      | E3SH28; Q43607 | Pru du 6  | - | - | - |
| GNLDFVQPPR       | E3SH28; Q43607 | Pru du 6  | - | - | - |
| GNLDFVQPPRG      | E3SH28; Q43607 | Pru du 6  | - | - | - |
| EQEQQGGGGQD      | E3SH29; Q43608 | Pru du 6  | - | - | - |
| QQGEQGRPGQ       | E3SH28; Q43607 | Pru du 6  | - | - | - |
| QQGQQEQQQE       | E3SH28; Q43607 | Pru du 6  | - | - | - |
| EHEERQQEQLQQE    | E3SH28; Q43607 | Pru du 6  | - | - | - |
| IVPQNHGVIQQ      | E3SH28; Q43607 | Pru du 6  | - | - | - |
| SQTHVPIRPN       | P82952         | Pru du AP | - | - | - |
| QQEQQGNGNNV      | Q43607         | Pru du 6  | - | - | - |
| GEQGRPGQHQQPF    | E3SH28; Q43607 | Pru du 6  | - | - | - |
| RQQQQQGEQG       | E3SH28; Q43607 | Pru du 6  | - | - | - |
| AGNPQDEFNPQ      | E3SH29; Q43608 | Pru du 6  | - | - | - |
| NENGDAILDQEVQQGQ | E3SH28; Q43607 | Pru du 6  | - | - | - |
| VTESWNPSDPQ      | E3SH29; Q43608 | Pru du 6  | - | - | - |
| VRGNLDFVQPPR     | E3SH28; Q43607 | Pru du 6  | - | - | - |
| ERQQQQQGEQG      | E3SH28; Q43607 | Pru du 6  | - | - | - |
| RLKENIGNPE       | E3SH28; Q43607 | Pru du 6  | - | - | - |
| DLNNDQNQLDQVPR   | E3SH29; Q43608 | Pru du 6  | - | - | - |
| RTDENGFTNT       | E3SH29; Q43608 | Pru du 6  | - | - | - |
| QQQEEGRQQE       | E3SH28; Q43607 | Pru du 6  | - | - | - |
| REGDIIALPA       | E3SH29; Q43608 | Pru du 6  | - | - | - |
| NENGDAILDQE      | E3SH28; Q43607 | Pru du 6  | - | - | - |

|                 |                |          |   |   |   |
|-----------------|----------------|----------|---|---|---|
| SFLRALPDEV      | E3SH28; Q43607 | Pru du 6 | - | - | - |
| TIEPNGLHLPS     | E3SH29         | Pru du 6 | - | - | - |
| TESWNPSDPQ      | E3SH29; Q43608 | Pru du 6 | - | - | - |
| IQAEAGQIET      | E3SH28; Q43607 | Pru du 6 | - | - | - |
| GEQGRPGQHQQ     | E3SH28; Q43607 | Pru du 6 | - | - | - |
| NPQDEFNPQQQGR   | E3SH29; Q43608 | Pru du 6 | - | - | - |
| GEQGRPGQHQQP    | E3SH28; Q43607 | Pru du 6 | - | - | - |
| IVPQNHGVIQ      | E3SH28; Q43607 | Pru du 6 | - | - | - |
| RGNLDFVQPP      | E3SH28; Q43607 | Pru du 6 | - | - | - |
| VRGNLDFVQPP     | E3SH28; Q43607 | Pru du 6 | - | - | - |
| GQDDNRNEIV      | E3SH29; Q43608 | Pru du 6 | - | - | - |
| FHVSSDHNQLDQNP  | E3SH28; Q43607 | Pru du 6 | - | - | - |
| LANAYQISREQAR   | E3SH28; Q43607 | Pru du 6 | - | - | - |
| RVQGQLDFVSP     | E3SH29; Q43608 | Pru du 6 | - | - | - |
| NENGDAILDQ      | E3SH28; Q43607 | Pru du 6 | - | - | - |
| QVVNENGDPI      | E3SH29; Q43608 | Pru du 6 | - | - | - |
| QQQEEGRQQEQ     | E3SH28; Q43607 | Pru du 6 | - | - | - |
| QGGGGQDNGVEET   | E3SH29; Q43608 | Pru du 6 | - | - | - |
| IEPNGLHLPS      | E3SH29         | Pru du 6 | - | - | - |
| QEQQNGNNV       | Q43607         | Pru du 6 | - | - | - |
| LAGNPQDEFN      | E3SH29; Q43608 | Pru du 6 | - | - | - |
| RALPDEVLQNA     | E3SH29         | Pru du 6 | - | - | - |
| LAGNPENEFN      | E3SH28; Q43607 | Pru du 6 | - | - | - |
| RLSQNIGDPS      | E3SH29; Q43608 | Pru du 6 | - | - | - |
| LDLNNDQNQLDQVPR | E3SH29; Q43608 | Pru du 6 | - | - | - |
| RGNLDFVQPPRG    | E3SH28; Q43607 | Pru du 6 | - | - | - |
| TIALSSSQQR      | E3SH28; Q43607 | Pru du 6 | - | - | - |
| TFEESQSSQ       | E3SH28; Q43607 | Pru du 6 | - | - | - |
| QREQEQGGGGQD    | E3SH29; Q43608 | Pru du 6 | - | - | - |
| EESQSSQQG       | E3SH28; Q43607 | Pru du 6 | - | - | - |
| NENGDAILDQEVQQG | E3SH28; Q43607 | Pru du 6 | - | - | - |
| YLAGNPQDEFN     | E3SH29; Q43608 | Pru du 6 | - | - | - |

|             |                  |                |           |   |   |   |
|-------------|------------------|----------------|-----------|---|---|---|
|             | YLAGNPENEFN      | E3SH28; Q43607 | Pru du 6  | - | - | - |
|             | SRSAGGRGDQ       | E3SH29; Q43608 | Pru du 6  | - | - | - |
|             | NLQQNDNRNQ       | E3SH28; Q43607 | Pru du 6  | - | - | - |
|             | LRALPDEVLA       | E3SH28; Q43607 | Pru du 6  | - | - | - |
|             | RNGLHLPYSYS      | E3SH28; Q43607 | Pru du 6  | - | - | - |
|             | AILKDFDQPGT      | Q8GSL5         | Pru du 4  | - | - | - |
|             | TNANALVYAIRGN    | E3SH29         | Pru du 6  | - | - | - |
|             | AAVSCGQVVNNL     | C0L0I5         | Pru du 3  | - | - | - |
|             | AGLAAGLPGK       | C0L0I5         | Pru du 3  | - | - | - |
|             | GAGAGAAAPAAAEPK  | Q8H2B9         | Pru du 5  | - | - | - |
|             | YLAGNPQDEFNPQQQG | E3SH29; Q43608 | Pru du 6  | - | - | - |
|             | IREGDIALPA       | E3SH29; Q43608 | Pru du 6  | - | - | - |
|             | FIVPQNHGVIQ      | E3SH28; Q43607 | Pru du 6  | - | - | - |
|             | LAGNPENEFNQ      | E3SH28; Q43607 | Pru du 6  | - | - | - |
|             | VQQQLDFVSP       | E3SH29; Q43608 | Pru du 6  | - | - | - |
|             | LIPQNHAVIT       | E3SH29; Q43608 | Pru du 6  | - | - | - |
|             | QAGNQGFYFA       | E3SH28; Q43607 | Pru du 6  | - | - | - |
|             | REGDVVAIPA       | E3SH28; Q43607 | Pru du 6  | - | - | - |
|             | PSGGGAVAVAA      | Q8H2B9         | Pru du 5  | - | - | - |
| H2O-AC10-GI | HVSSDHNQLDQNPR   | E3SH28; Q43607 | Pru du 6  | - | - | - |
|             | HVSSDHNQLDQNP    | E3SH28; Q43607 | Pru du 6  | - | - | - |
|             | QGEDQQDRHQ       | E3SH29; Q43608 | Pru du 6  | - | - | - |
|             | VRGNLDFVQPPR     | E3SH28; Q43607 | Pru du 6  | - | - | - |
|             | QQGEQGRPGQH      | E3SH28; Q43607 | Pru du 6  | - | - | - |
|             | RNLQGQDDNRNEIV   | E3SH29; Q43608 | Pru du 6  | - | - | - |
|             | QQEQQQGQGRPQ     | E3SH28; Q43607 | Pru du 6  | - | - | - |
|             | QQGEQGRPGQH      | E3SH28; Q43607 | Pru du 6  | - | - | - |
|             | TKSQTHVPIRPN     | P82952         | Pru du AP | - | - | - |
|             | RNLQGQDDNRNEI    | E3SH29; Q43608 | Pru du 6  | - | - | - |
|             | DLNNDQNQLDQVPR   | E3SH29; Q43608 | Pru du 6  | - | - | - |
|             | FHVSSDHNQLDQNPR  | E3SH28; Q43607 | Pru du 6  | - | - | - |
|             | VSSDHNQLDQNPR    | E3SH28; Q43607 | Pru du 6  | - | - | - |

|                 |                |           |   |   |   |
|-----------------|----------------|-----------|---|---|---|
| GNLDFVQPPR      | E3SH28; Q43607 | Pru du 6  | - | - | - |
| SDHNQLDQNPR     | E3SH28; Q43607 | Pru du 6  | - | - | - |
| QREQEQQGGGGQD   | E3SH29; Q43608 | Pru du 6  | - | - | - |
| QQQGQQGRPQ      | E3SH28; Q43607 | Pru du 6  | - | - | - |
| SSDHNQLDQNPR    | E3SH28; Q43607 | Pru du 6  | - | - | - |
| GNLDFVQPPRG     | E3SH28; Q43607 | Pru du 6  | - | - | - |
| QQQDDNRNEI      | E3SH29; Q43608 | Pru du 6  | - | - | - |
| AGNPQDEFNPQ     | E3SH29; Q43608 | Pru du 6  | - | - | - |
| DHNQLDQNPR      | E3SH28; Q43607 | Pru du 6  | - | - | - |
| PILDDEVREGQ     | E3SH29         | Pru du 6  | - | - | - |
| EQQQQQGRPQ      | E3SH28; Q43607 | Pru du 6  | - | - | - |
| QQGEQGRPGQHQQPF | E3SH28; Q43607 | Pru du 6  | - | - | - |
| RVQQQLDFVSP     | E3SH29; Q43608 | Pru du 6  | - | - | - |
| SSDHNQLDQNP     | E3SH28; Q43607 | Pru du 6  | - | - | - |
| RGNLDFVQPPR     | E3SH28; Q43607 | Pru du 6  | - | - | - |
| QQGQQEQQQE      | E3SH28; Q43607 | Pru du 6  | - | - | - |
| LDLNNDQNQLDQVPR | E3SH29; Q43608 | Pru du 6  | - | - | - |
| QQGEQGRPGQ      | E3SH28; Q43607 | Pru du 6  | - | - | - |
| VRGNLDFVQPP     | E3SH28; Q43607 | Pru du 6  | - | - | - |
| NENGDAILDQE     | E3SH28; Q43607 | Pru du 6  | - | - | - |
| SQTHVPIRPN      | P82952         | Pru du AP | - | - | - |
| SDHNQLDQNP      | E3SH28; Q43607 | Pru du 6  | - | - | - |
| QEQQQQGRPQ      | E3SH28; Q43607 | Pru du 6  | - | - | - |
| QQGEQGRPGQHQQP  | E3SH28; Q43607 | Pru du 6  | - | - | - |
| VTESWNPSDPQ     | E3SH29; Q43608 | Pru du 6  | - | - | - |
| RALPDEVLQNA     | E3SH29         | Pru du 6  | - | - | - |
| SQNIGDPSRAD     | E3SH29; Q43608 | Pru du 6  | - | - | - |
| NGDPILDDEVR     | E3SH29         | Pru du 6  | - | - | - |
| QQEQQGSGNNV     | E3SH28         | Pru du 6  | - | - | - |
| HIREGDIIALPA    | E3SH29; Q43608 | Pru du 6  | - | - | - |
| RQQQQQGEQG      | E3SH28; Q43607 | Pru du 6  | - | - | - |
| EQEQQGGGGQD     | E3SH29; Q43608 | Pru du 6  | - | - | - |

|                  |                |          |   |   |   |
|------------------|----------------|----------|---|---|---|
| GEQGRPGQHQQP     | E3SH28; Q43607 | Pru du 6 | - | - | - |
| IVPQNHGVIQQ      | E3SH28; Q43607 | Pru du 6 | - | - | - |
| PILDDEVREG       | E3SH29         | Pru du 6 | - | - | - |
| GQDDNRNEIV       | E3SH29; Q43608 | Pru du 6 | - | - | - |
| NENGDAILDQ       | E3SH28; Q43607 | Pru du 6 | - | - | - |
| QGGGGQDNGVEET    | E3SH29; Q43608 | Pru du 6 | - | - | - |
| TESWNPSDPQ       | E3SH29; Q43608 | Pru du 6 | - | - | - |
| RGNLDFVQPP       | E3SH28; Q43607 | Pru du 6 | - | - | - |
| REGDIIALPA       | E3SH29; Q43608 | Pru du 6 | - | - | - |
| IVPQNHGVIQ       | E3SH28; Q43607 | Pru du 6 | - | - | - |
| TIEPNGLHLPS      | E3SH29         | Pru du 6 | - | - | - |
| IQAEGQIET        | E3SH28; Q43607 | Pru du 6 | - | - | - |
| RALPDEVLANA      | E3SH28; Q43607 | Pru du 6 | - | - | - |
| QQQEEGRQQEQ      | E3SH28; Q43607 | Pru du 6 | - | - | - |
| PILNDEVREGQ      | Q43608         | Pru du 6 | - | - | - |
| AILDQEVQQGQ      | E3SH28; Q43607 | Pru du 6 | - | - | - |
| VQGQLDFVSP       | E3SH29; Q43608 | Pru du 6 | - | - | - |
| QQEEQQSQRE       | E3SH29; Q43608 | Pru du 6 | - | - | - |
| NENGDAILDQEVQQGQ | E3SH28; Q43607 | Pru du 6 | - | - | - |
| QEQQGGGGQDN      | E3SH29; Q43608 | Pru du 6 | - | - | - |
| GEQGRPGQHQQPF    | E3SH28; Q43607 | Pru du 6 | - | - | - |
| EHEERQQEQLQQE    | E3SH28; Q43607 | Pru du 6 | - | - | - |
| RLKENIGNPE       | E3SH28; Q43607 | Pru du 6 | - | - | - |
| IREGDIIALPA      | E3SH29; Q43608 | Pru du 6 | - | - | - |
| NENGDAILDQEVQQG  | E3SH28; Q43607 | Pru du 6 | - | - | - |
| RLSQNIGDPS       | E3SH29; Q43608 | Pru du 6 | - | - | - |
| STLNSHNLPI       | E3SH28; Q43607 | Pru du 6 | - | - | - |
| SVVNRNHLPI       | E3SH29; Q43608 | Pru du 6 | - | - | - |
| IEPNGLHLPS       | E3SH29         | Pru du 6 | - | - | - |
| SLLDLNNDQN       | E3SH29; Q43608 | Pru du 6 | - | - | - |
| VVNENGDAILD      | E3SH28; Q43607 | Pru du 6 | - | - | - |
| NLQQQNDNRNQ      | E3SH28; Q43607 | Pru du 6 | - | - | - |



|                  |                |          |   |   |   |
|------------------|----------------|----------|---|---|---|
| NGDAILDQEV       | E3SH28; Q43607 | Pru du 6 | - | - | - |
| EESQSSQQG        | E3SH28; Q43607 | Pru du 6 | - | - | - |
| ERQQQQQGEQG      | E3SH28; Q43607 | Pru du 6 | - | - | - |
| NLQGQDDNRNE      | E3SH29; Q43608 | Pru du 6 | - | - | - |
| SVVNRNHLPI       | E3SH29; Q43608 | Pru du 6 | - | - | - |
| SLLDLNNDQNQ      | E3SH29; Q43608 | Pru du 6 | - | - | - |
| LLDLNNDQNQLDQVPR | E3SH29; Q43608 | Pru du 6 | - | - | - |
| RTIEPNGLHLPS     | E3SH29         | Pru du 6 | - | - | - |
| NPQGGRISVV       | E3SH29; Q43608 | Pru du 6 | - | - | - |
| HLPSYSNAPQ       | E3SH28; Q43607 | Pru du 6 | - | - | - |
| SRSAGGRGDQ       | E3SH29; Q43608 | Pru du 6 | - | - | - |
| EPDNRIQAEAG      | E3SH28; Q43607 | Pru du 6 | - | - | - |
| AQALNVNEET       | E3SH28; Q43607 | Pru du 6 | - | - | - |
| VSLLDLNNDQN      | E3SH29; Q43608 | Pru du 6 | - | - | - |
| LRALPDEVLA       | E3SH28; Q43607 | Pru du 6 | - | - | - |
| ISVVNRNHLPI      | E3SH29; Q43608 | Pru du 6 | - | - | - |
| TNANALVYAIRGN    | E3SH29         | Pru du 6 | - | - | - |
| GVIQQAGNQGFE     | E3SH28; Q43607 | Pru du 6 | - | - | - |
| YLAGNPQDEFNPQQG  | E3SH29; Q43608 | Pru du 6 | - | - | - |
| LIPQNHAVIT       | E3SH29; Q43608 | Pru du 6 | - | - | - |
| YLAGNPQDEFN      | E3SH29; Q43608 | Pru du 6 | - | - | - |
| YLAGNPENEFN      | E3SH28; Q43607 | Pru du 6 | - | - | - |
| AGLAAGLPGK       | C0L0I5         | Pru du 3 | - | - | - |
| AILDQEVQQG       | E3SH28; Q43607 | Pru du 6 | - | - | - |
| VAVAAPGAGAGAAAP  | Q8H2B9         | Pru du 5 | - | - | - |
| RQQQGGQLMANG     | E3SH28         | Pru du 6 | - | - | - |
| VIQQAGNQGFE      | E3SH28; Q43607 | Pru du 6 | - | - | - |
| TFEESQSSQ        | E3SH28; Q43607 | Pru du 6 | - | - | - |
| GNPQDEFNPQ       | E3SH29; Q43608 | Pru du 6 | - | - | - |
| LAARQSQLSPQ      | E3SH28; Q43607 | Pru du 6 | - | - | - |
| ALPDEVLQNA       | E3SH29         | Pru du 6 | - | - | - |
| ILDDEVREGQ       | E3SH29         | Pru du 6 | - | - | - |

|                |                |                   |   |   |   |
|----------------|----------------|-------------------|---|---|---|
| QVVENGDPI      | E3SH29; Q43608 | Pru du 6          | - | - | - |
| PSGGGAVAVAA    | Q8H2B9         | Pru du 5          | - | - | - |
| ISDQSKVGEQ     | P82944         | Pru du 2S Albumin | - | - | - |
| EQEQQGGGGQ     | E3SH29; Q43608 | Pru du 6          | - | - | - |
| RALPDEVLAN     | E3SH28; Q43607 | Pru du 6          | - | - | - |
| ANAGLAAGLPGKCG | C0L015         | Pru du 3          | - | - | - |
| QQQQQQQQGNGNN  | E3SH29; Q43608 | Pru du 6          | - | - | - |
